1 **Combinatorial interactions between viral proteins expand the functional landscape of**  
2 **the viral proteome**

3 Liping Wang<sup>1,2\*</sup>, Huang Tan<sup>1,2\*</sup>, Laura Medina-Puche<sup>1</sup>, Mengshi Wu<sup>1,2</sup>, Borja Garnelo Gómez<sup>1</sup>,  
4 Man Gao<sup>1,2</sup>, Chaonan Shi<sup>1</sup>, Tamara Jimenez-Góngora<sup>1,2</sup>, Pengfei Fan<sup>1,2</sup>, Xue Ding<sup>1,2</sup>, Dan  
5 Zhang<sup>1,2</sup>, Ding Yi<sup>1,2</sup>, Tábata Rosas-Díaz<sup>1</sup>, Yujing Liu<sup>1</sup>, Emmanuel Aguilar<sup>1,3</sup>, Xing Fu<sup>1</sup>, Rosa  
6 Lozano-Durán<sup>1,4#</sup>

7 <sup>1</sup>Shanghai Center for Plant Stress Biology, CAS Center for Excellence in Molecular Plant Sciences,  
8 Chinese Academy of Sciences, Shanghai 201602, China. <sup>2</sup>University of the Chinese Academy of  
9 Sciences, Beijing 100049, China. <sup>3</sup>Instituto de Hortofruticultura Subtropical y Mediterránea “La Mayora”  
10 (IHSM-UMA-CSIC), Area de Genética, Facultad de Ciencias, Universidad de Málaga, Campus de  
11 Teatinos s/n, E-29071 Málaga, Spain. <sup>4</sup>Department of Plant Biochemistry, Centre for Plant Molecular  
12 Biology (ZMBP), Eberhard Karls University, D-72076 Tübingen, Germany.

13 \*These authors contributed equally to this work

14 #Corresponding author

15

16 **ABSTRACT**

17 As intracellular parasites, viruses need to manipulate the molecular machinery of their host  
18 cells in order to enable their own replication and spread. This manipulation is based on the  
19 activity of virus-encoded proteins. The reduced size of viral genomes imposes restrictions in  
20 coding capacity; how the action of the limited number of viral proteins results in the massive  
21 cell reprogramming observed during the viral infection is a long-standing conundrum in  
22 virology. In this work, we explore the hypothesis that combinatorial interactions expand the  
23 multifunctionality of viral proteins, which may exert different activities individually and when in  
24 combination, physical or functional. We show that the proteins encoded by a plant-infecting  
25 DNA virus physically associate with one another in an intricate network. Our results further  
26 demonstrate that these interactions can modify the subcellular localization of the viral proteins  
27 involved, and that co-expressed interacting viral proteins can exert novel biological functions  
28 *in planta* that go beyond the sum of their individual functions. Based on this, we propose a  
29 model in which combinatorial physical and functional interactions between viral proteins  
30 enlarge the functional landscape of the viral proteome, which underscores the importance of  
31 studying the role of viral proteins in the context of the infection.

32

33 **KEYWORDS**

34 Viral proteins, combinatorial interactions, protein-protein interactions, functional interactions,  
35 network, geminivirus, TYLCV.

36

37

## 38 INTRODUCTION

39 Viruses are intracellular parasites that need to subvert the host cell in order to enable their  
40 replication and ensure viral spread. For this purpose, viruses co-opt the cell molecular  
41 machinery, modulating or redirecting its functions; as a result, infected cells undergo dramatic  
42 molecular changes, including heavy transcriptional reprogramming, concomitant to the  
43 proliferation of the virus.

44 Most viruses have small genomes, which imposes limitations in coding capacity, with viral  
45 proteins frequently exhibiting small size, and with their numbers per viral genome ranging from  
46 a few (<10) to a few dozen (Supplementary figure 1). Viral proteins are known to be  
47 multifunctional, and have been suggested to target hubs in the proteomes of their host cells  
48 (Brito and Pinney, 2017; Dyer et al., 2011; King et al., 2018; Zheng et al., 2014), hence  
49 maximizing the impact of the viral-host protein-protein interactions; nevertheless, how a limited  
50 repertoire of small viral proteins can lead to the drastic cellular changes observed during the  
51 viral infection remains puzzling. Upon viral invasion, virus-encoded proteins are produced in  
52 large amounts in the infected cells, where they co-exist. Therefore, physical or functional  
53 interactions among viral proteins might have evolved as a potential mechanism to expand the  
54 virus-host functional interface, increasing the number of potential targets in the host cell and/or  
55 synergistically modulating the cellular environment. Interestingly, examples of interactions  
56 between viral proteins have been recently documented for both animal and plant viruses (e.g.  
57 (Ashford et al., 2016; Bragg and Jackson, 2004; Calderwood et al., 2007; Dao et al., 2020;  
58 DeBlasio et al., 2018; Fossum et al., 2009; Hagen et al., 2014; Leastro et al., 2018; Lee et al.,  
59 2011; Li et al., 2020; Li et al., 2021; Liu et al., 2010; Loureiro et al., 2012; Nobre et al., 2019;  
60 Rozen et al., 2008; Stellberger et al., 2010; Uetz et al., 2006; Varasteh Moradi et al., 2020;  
61 von Brunn et al., 2007); see VirHostNet 2.0, <http://virhostnet.prabi.fr/>, Guirimand et al., 2015);  
62 some of these interactions have been proposed to contribute to viral genome replication and  
63 virion assembly. However, the hypothesis that the combination of individual virus-encoded  
64 proteins might result in the acquisition of novel functions still lacks experimental support.

65 Here, we use the plant DNA virus *Tomato yellow leaf curl virus* (TYLCV; Fam. *Geminiviridae*)  
66 to test the idea that combinatorial interactions among viral proteins exist and may underlie an  
67 expansion of the functional landscape of the viral proteome. TYLCV encodes six proteins  
68 (C1/Rep, C2, C3, C4, V2, and CP); local infection by TYLCV in the experimental host *Nicotiana*  
69 *benthamiana* results in heavy transcriptional reprogramming, with 11,850 differentially  
70 expressed genes (DEGs) detected at 6 days post-inoculation (dpi) (Wu et al., 2019). Although  
71 a limited number of viral protein-protein interactions have been described for this virus (Hallan  
72 and Gafni, 2001; Settlage et al., 2005; Wang et al., 2020; Wang et al., 2017b; Zhao et al.,  
73 2018; Zhao et al., 2020), the intra-viral interactome has not been systematically explored, and  
74 the functional impact of these interactions remains elusive. Our results show that viral proteins  
75 form complexes in the context of the viral infection, displaying a high degree of intra-viral  
76 connectivity. As proof-of-concept, we focus on the pair formed by C2 and CP, since the  
77 presence of the latter is required and sufficient to shift the subcellular localization of the former;

78 our data indicate that the combination of C2 and CP results in drastic transcriptional  
79 reprogramming in the host plant, which goes beyond the sum of the effects of each of the  
80 individual proteins.

81

## 82 **RESULTS AND DISCUSSION**

### 83 **Viral proteins form complexes in the host cell**

84 In order to test whether virus-encoded proteins associate with one another, we employed a  
85 number of protein-protein interaction methods, namely yeast two-hybrid (Y2H), *in planta* co-  
86 immunoprecipitation (co-IP), bimolecular fluorescence complementation (BiFC), and split-  
87 luciferase assays. Several viral protein-protein interactions were identified in yeast (Figure 1A;  
88 Supplementary figure 2); the number of associations between viral proteins found in co-IP was  
89 higher, and some of them were dependent on the presence of the virus (Figure 1B;  
90 Supplementary figure 3; Supplementary figure 4). These interactions were further confirmed  
91 in BiFC and split-luciferase experiments (Figure 1C, D). BiFC indicates that most of the  
92 detected interactions occur in the nucleus (Figure 1C; Supplemental figure 5; additional  
93 patterns of interactions observed by BiFC can be found in Supplementary figure 6). A  
94 summary of all detected interactions between viral proteins is shown in Figure 1E; all viral  
95 proteins were found to interact with one another, including self-interactions, by at least two  
96 independent methods. Importantly, some of these interactions could also be detected in  
97 unbiased affinity purification followed by mass spectrometry (AP-MS) experiments with GFP-  
98 tagged versions of the viral proteins expressed in infected *N. benthamiana* cells (Wang et al.,  
99 2017a), indicating that viral proteins physically associate with one another in the context of the  
100 infection (Supplementary table 1).

101

### 102 **The viral CP is required and sufficient to modify the subcellular localization of the virus- 103 encoded C2 protein**

104 Although the proteins encoded by TYLCV display specific localizations in the plant cell, all of  
105 them, with the exception of C4, can be consistently found in the nucleus in basal conditions  
106 (Figure 2A). Interestingly, in the presence of the virus, several viral proteins fused to GFP,  
107 namely C2, C3, C4, and CP, experienced obvious changes in their subcellular distribution  
108 (Figure 2A). These changes had been previously observed for C4 and CP; while in the case  
109 of C4, Rep alone can trigger its re-localization from the plasma membrane to chloroplasts  
110 (Medina-Puche et al., 2020), no individual protein was sufficient to modify the subnuclear  
111 pattern of CP (Wang et al., 2017b). In the absence of the virus, C2-GFP appears evenly  
112 distributed in the nucleoplasm and is excluded from the nucleolus, where it strongly  
113 accumulates when the virus is present; based on this gain of localization, we reasoned that  
114 C2 might perform additional functions in the context of the infection. Binary combinations with

115 the virus-encoded proteins fused to RFP indicated that CP is sufficient to induce the  
116 localization of C2-GFP in the nucleolus (Figure 2B), where both proteins interact (Figure 1C);  
117 this was further confirmed by co-expression with the untagged version of the protein (Figure  
118 2C; Supplementary figure 7A). Of note, only C2-GFP, but not GFP-C2, can be re-localized by  
119 CP (Figure 2C). Importantly, removal of the start codon and alternative transcription initiation  
120 sites in the CP ORF rendered the virus unable to re-localize C2 to the nucleolus (Figure 2D;  
121 Supplementary figure 7B), indicating that CP is not only sufficient, but also required for this  
122 change to occur in infected cells.

123

## 124 **The C2/CP module specifically modifies the host transcriptome and modulates plant** 125 **defence**

126 With the purpose of assessing if the functional landscape of C2 might be expanded when in  
127 the presence of CP, and considering that the C2 protein from geminiviruses has been  
128 previously described to impact host gene expression (Caracuel et al., 2012; Liu et al., 2014;  
129 Rosas-Diaz et al., 2016; Soitamo et al., 2012; Trinks et al., 2005; Yang et al., 2013), we  
130 decided to investigate the transcriptional changes triggered by C2 in the presence or absence  
131 of CP. To this aim, we expressed C2, CP, or C2+CP in *N. benthamiana* leaves and determined  
132 the resulting changes in the plant transcriptome by RNA-seq. As shown in Figure 3A, C2 alone  
133 caused the differential expression of 211 genes, while expression of CP did not significantly  
134 affect the plant transcriptional landscape; simultaneous expression of C2 and CP resulted in  
135 a moderate increase in the number of differentially expressed genes (DEGs) to 263 (Figure  
136 3A; Supplementary figure 8A, B; validation of the RNA-seq results is presented in  
137 Supplementary figure 8C; Supplementary table 2). Strikingly, however, the identity and  
138 behavior of DEGs was dramatically changed by the presence of CP (Figure 3B, C), indicating  
139 that C2 and CP have a synergistic effect on the host transcriptome. Functional enrichment  
140 analysis unveiled that addition of CP indeed shifted the functional gene ontology (GO)  
141 categories transcriptionally reprogrammed by C2, and that certain categories appear as  
142 statistically over-represented in the subset of down-regulated genes only when both viral  
143 proteins are simultaneously expressed (Figure 3D, E; Supplementary table 3). To investigate  
144 the relevance of the re-localization of C2 (Figure 2C) for this effect, we selected DEGs  
145 specifically affected by the co-expression of C2 and CP, and tested the ability of C2-GFP  
146 (which re-localizes in the presence of CP) or GFP-C2 (which does not re-localize in the  
147 presence of CP) to affect their expression when combined with CP. As shown in Figure 3F  
148 and Supplementary Figure 8D, only C2+CP and C2-GFP+CP, but not GFP-C2+CP, affect the  
149 expression of the selected genes compared with C2, C2-GFP, or GFP-C2, respectively. This  
150 result suggests that the modification in subcellular localization of C2 mediated by CP is  
151 required for the impact of the combination of these proteins on gene expression. Stress-related  
152 GO functional categories are over-represented in the subsets of C2-triggered DEGs, but  
153 disappear when CP is present (Figure 3D), suggesting that the effect of C2 on the plant

154 response to stress might change upon co-expression of CP. With the aim to test this idea, we  
155 subjected *N. benthamiana* tissue expressing C2, CP, C2+CP, or  $\beta$ -glucuronidase (GUS) as a  
156 negative control to inoculation with the plant pathogenic bacterium *Pseudomonas syringae* pv.  
157 *tomato* DC3000  $\Delta$ hopQ1-1. Expression of C2 rendered the plant more resistant to the bacteria,  
158 while expression of CP did not impact bacterial multiplication; simultaneous expression of C2  
159 and CP, however, led to a mild decrease in bacterial load, statistically different from the one  
160 caused by C2 alone (Figure 3G). These results demonstrate that the presence of CP  
161 modulates the impact of C2 on the response to this biotic stress.

162 Next, we investigated the contribution of C2 and CP to the virus-induced transcriptional  
163 reprogramming in the context of the viral infection. We reasoned that, if C2 and CP together  
164 affect the transcriptional landscape of the host in a different manner than C2 or CP alone, then  
165 the transcriptional changes triggered by mutated versions of the virus unable to produce either  
166 C2 or CP should present overlapping differences compared to the changes triggered by the  
167 wild-type (WT) virus. Following this rationale, we compared the transcriptome of *N.*  
168 *benthamiana* leaves infected with the WT virus or mutated versions unable to produce C2  
169 (TYLCV-C2mut) or CP (TYLCV-CPmut1), with respect to the empty vector (EV) control (Figure  
170 4A) or to the WT virus (Figure 4B). As expected, both point mutants were unable to establish  
171 a full systemic infection, indicating that the corresponding viral proteins are most likely not  
172 produced from the mutated genes (Supplemental figure 9A, B). Of note, although the CP null  
173 mutant (TYLCV-CPmut1) replicated to lower levels, no significant changes in the accumulation  
174 of viral transcripts were detected among these viral variants in local infection assays  
175 (Supplementary figure 7B; Supplementary figure 9C-F). Importantly, and despite the fact that  
176 expression of CP alone did not result in detectable transcriptional changes, mutation of CP in  
177 the viral genome led to the differential expression of 3,256 genes when compared to the WT  
178 infection, supporting the notion that CP modulates host gene expression in combination,  
179 physical or functional, with other viral proteins; remarkably, 2,591 of these DEGs (79.5%)  
180 overlapped with those caused by the loss of C2 (Figure 4C; Figure 4D; Supplementary figure  
181 9G; Supplementary table 2; validation of the RNA-seq results is presented in Supplementary  
182 figure 9H), indicating that C2 and CP cooperatively mediate changes in host gene expression  
183 during the infection. Functional categories over-represented among the up-regulated genes in  
184 the presence of the WT virus appear as down-regulated in the subset of DEGs commonly  
185 triggered by the C2- and CP-deficient viruses compared to the WT version (Figure 4E; Figure  
186 S10; Supplementary tables 4 and 5), suggesting that the C2/CP module is responsible for the  
187 transcriptional changes of genes associated to these GO terms. A complete overview of the  
188 functional enrichment in the different subsets of DEGs can be found in Supplementary figure  
189 10 and Supplementary table 5.

190 Taken together, our results demonstrate that TYLCV proteins form an intricate network of  
191 interactions that potentially vastly increase the complexity of the virus-host interface, and that  
192 viral proteins can exert additional functions when in combination. Given that intra-viral protein-  
193 protein interactions have been reported for viruses belonging to independently evolved

194 families and infecting hosts belonging to different kingdoms of life, we propose that this might  
195 be an evolutionary strategy of viruses, which would call for a reconsideration of our  
196 approaches to the study of virus-host interactions.

197

## 198 **MATERIALS AND METHODS**

### 199 **Plant material**

200 *Nicotiana benthamiana* plants were grown in a controlled growth chamber in long-day  
201 conditions (16 h light/8 h dark) at 25°C.

202

### 203 **Bacterial strains and growth conditions**

204 *Agrobacterium tumefaciens* strain GV3101 harbouring the corresponding binary vectors were  
205 liquid-cultured in LB medium (1% tryptone, 0.5% yeast extract, and 1% NaCl) with the  
206 appropriate antibiotics at 28°C overnight. *P. syringae* pv. *tomato* DC3000  $\Delta$ *hopQ1-1* (Rufian  
207 et al., 2018) was cultured on solid LB medium (1% tryptone, 0.5% yeast extract, and 0.5%  
208 NaCl) with the appropriate antibiotics at 28°C overnight.

209

### 210 **Plasmids and cloning**

211 Open reading frames (ORFs, corresponding to Rep, C2, C3, C4, V2, and CP) from TYLCV  
212 (GenBank accession number AJ489258) were cloned in pENTR/D-TOPO (Thermo Scientific)  
213 without a stop codon (Wang et al., 2017a). The binary constructs to express viral proteins  
214 without tag, tagged with Cter-GFP, Nter-GFP, Cter-FLAG, or Cter-RFP, were generated by  
215 Gateway-cloning (LR reaction, Thermo Scientific) the TYLCV ORFs from pENTR/D-TOPO  
216 into pGWB2 (Nakagawa et al., 2007a), pGWB5 (Nakagawa et al., 2007a), pGWB6 (Nakagawa  
217 et al., 2007a), pGWB511 (Nakagawa et al., 2007b), and pGWB554 (Nakagawa et al., 2007b),  
218 respectively, with the exception of the construct to express C4-RFP, which was generated by  
219 Gateway-cloning the C4 ORF into pB7RWG2.0 (Karimi et al., 2002). For biomolecular  
220 fluorescence complementation assays (BiFC), the TYLCV ORFs were Gateway-cloned into  
221 pGTQL1211YN and pGTQL1221YC (Lu et al., 2010). For yeast two-hybrid assays (Y2H),  
222 pGBKT7 and pGADT7 (Clontech) were digested with *EcoRI* and *PstI* or *EcoRI* and *BamHI*,  
223 respectively, and the PCR-amplified Rep, C2, C3, C4, V2, and CP ORFs were in-fused to the  
224 C-terminus of the GAL4 DNA-binding domain (in pGBKT7) and the C-terminus of GAL4  
225 activation domain (in pGADT7) with ClonExpress® II One Step Cloning Kit (Vazyme). The  
226 binary constructs for split-luciferase complementation imaging assay were generated by  
227 Gateway cloning the TYLCV ORFs into pGWB-nLuc and pGWB-cLuc (Wang et al., 2019).

228 The TYLCV infectious clone has been previously described (Rosas-Diaz et al., 2018). Using  
229 the wild-type (WT) infectious clone as template, the TYLCV C2 null mutant (TYLCV-C2mut),  
230 carrying a C-to-G mutation in the 14th nucleotide of the C2 ORF, was generated, converting  
231 the fifth codon (encoding a serine) to a stop codon, with the Quick Change Lightning Site-  
232 Directed Mutagenesis Kit (Agilent Technologies, Cat #210518). Similarly, the TYLCV CP null  
233 mutant 1 (TYLCV-CPmut1), carrying a C-to-A mutation in the fourth nucleotide of the CP ORF,  
234 was generated, converting the second codon (encoding a serine) to a stop codon. The TYLCV-  
235 CPmut2 infectious clone, containing two premature stop codons in positions 2 and 15 and in

236 which the nine potential alternative starting sites (ATG) have been removed, was synthesized.  
237 In both cases, the mutations in the CP ORF do not affect the overlapping V2 ORF.  
238 All primers and plasmids used for cloning are summarized in Supplementary tables 6 and 7,  
239 respectively.

240

#### 241 **Agrobacterium-mediated transient gene expression in *N. benthamiana***

242 Transient expression assays were performed as previously described (Wang et al., 2017a)  
243 with minor modifications. In brief, all binary plasmids were transformed into *A. tumefaciens*  
244 strain GV3101; *A. tumefaciens* clones carrying the constructs of interest were liquid-cultured  
245 in LB with the appropriate antibiotics at 28°C overnight. Bacterial cultures were collected by  
246 centrifugation at 4,000 x g for 10 min and resuspended in the infiltration buffer (10 mM MgCl<sub>2</sub>,  
247 10 mM MES pH 5.6, 150 µM acetosyringone) to an OD<sub>600</sub> = 0.2-0.5. Next, bacterial  
248 suspensions were incubated at room temperature in the dark for 2-4 hours before infiltration  
249 into the abaxial side of 4-week-old *N. benthamiana* leaves with a 1 mL needleless syringe. For  
250 experiments that required co-infiltration, the *Agrobacterium* suspensions carrying different  
251 constructs were mixed at 1:1 ratio before infiltration.

252

#### 253 **Protein extraction and immunoprecipitation assays**

254 Fully expanded young leaves of 4-week-old *N. benthamiana* plants were co-infiltrated with *A.*  
255 *tumefaciens* carrying constructs to express Rep-, C2-, C3-, C4-, CP-, and V2-flag, with Rep-,  
256 C2-, C3-, C4-, CP- or V2-GFP. To analyze these protein-protein interactions in the context of  
257 the viral infection, *A. tumefaciens* carrying the infectious TYLCV clone were co-infiltrated in  
258 the respective experiments. Two days after infiltration, 0.7-1 g of infiltrated *N. benthamiana*  
259 leaves were harvested. Protein extraction, co-immunoprecipitation (co-IP), and western blot  
260 were performed as previously described (Macho et al., 2014). For western blot, the following  
261 primary and secondary antibodies were used: mouse anti-green fluorescent protein (GFP)  
262 (M0802-3a, Abiocode, Agoura Hills, CA, USA) (1:10,000), rabbit polyclonal anti-flag epitope  
263 (FLAG) (F7425, Sigma, St. Louis, MO, USA) (1:10,000), goat polyclonal anti-mouse coupled  
264 to horseradish peroxidase (A2554, Sigma, St. Louis, MO, USA) (1:15,000), and goat  
265 polyclonal anti-rabbit coupled to horseradish peroxidase (A0545, Sigma, St. Louis, MO, USA)  
266 (1:15,000).

#### 267 **Bimolecular Fluorescence Complementation (BiFC)**

268 Fully expanded young leaves of 4-week-old *N. benthamiana* plants were co-infiltrated with *A.*  
269 *tumefaciens* clones carrying the appropriate BiFC plasmids using a 1 mL needleless syringe  
270 and imaged two days post-infiltration with a Leica TCS SMD confocal microscope (Leica  
271 Microsystems) using the preset settings for YFP (Ex: 514 nm, Em: 525-575 nm). For nuclei  
272 staining, leaves were infiltrated with 5 µg/mL Hoechst 33258 (Sigma) solution and incubated  
273 in the dark for 30-60 minutes before observation by using the corresponding preset settings  
274 (Ex: 355 nm, Em: 430-480 nm).

275

#### 276 **Yeast two-hybrid**

277 pGBKT7- and pGADT7-based constructs were co-transformed into the Y2HGold yeast strain  
278 (Clontech) using Yeastmaker™ Yeast Transformation System 2 (Clontech) according to the  
279 manufacturer's instructions. The co-transformants were selected on minimal synthetic defined

280 (SD) media without leucine and tryptophan; interactions were tested on SD media without  
281 leucine, tryptophan, histidine, and adenine. pGADT7-T and pGBKT7-p53 constructs were  
282 used as positive control; empty vectors were used as negative control.

### 283 **Split-luciferase complementation imaging assay**

284 *A. tumefaciens* strains carrying the appropriate plasmids were agroinfiltrated into 4-week-old  
285 *N. benthamiana* plants using a 1 mL needleless syringe. Two days post-infiltration, the same  
286 leaves were infiltrated with 1 mM D-luciferin solution and kept in the dark for 5 min before  
287 imaging. The luminescence images were captured using a CCD camera (NightShade LB 985,  
288 Berthold).

289

### 290 **Visualization of protein subcellular localization**

291 For subcellular localization, plant tissues expressing GFP- or RFP-fused proteins were imaged  
292 with a Leica TCS SP8 confocal microscope (Leica Microsystems) using the preset settings for  
293 GFP (Ex: 488 nm, Em: 500-550 nm) or RFP (Ex: 554 nm, Em: 580-630 nm).

294 Confocal imaging for co-localization of C2-GFP and TYLCV proteins fused to RFP was  
295 performed on a Leica TCS SP8 point scanning confocal microscope using the pre-set  
296 sequential scan settings for GFP (Ex:488 nm, Em:500–550 nm) and RFP (Ex:561 nm,  
297 Em:600–650 nm).

298

### 299 **TYLCV infection**

300 For TYLCV local infection assays, fully expanded young leaves of 4-week-old *N. benthamiana*  
301 plants were infiltrated with *A. tumefaciens* carrying the TYLCV infectious clone (WT or  
302 mutants). Samples were collected at 2.5 days post-inoculation (dpi) to detect viral  
303 accumulation.

304 For TYLCV systemic infection assays, *A. tumefaciens* carrying the TYLCV infectious clone  
305 (WT or mutants) were syringe-inoculated in the stem of 2-week-old *N. benthamiana* plants.  
306 Leaf discs from the three youngest apical leaves were harvested at 21 dpi to detect viral  
307 accumulation.

### 308 **Determination of viral accumulation by quantitative PCR (qPCR)**

309 To determine viral accumulation, total DNA was extracted from *N. benthamiana* leaves using  
310 the CTAB method (Minas et al., 2011). The DNA from local infection assays was treated with  
311 *DpnI* at 37°C for 1 hour prior to further analysis. Quantitative PCR (qPCR) was performed with  
312 primers to amplify Rep (Wang et al., 2017b). The qPCR reaction was performed with Hieff®  
313 qPCR SYBR® Green Master Mix (Yeasen), with the following program: 3 min at 95°C, and 40  
314 cycles consisting of 15 s at 95°C, 30 s at 60°C. As internal reference for DNA detection, the  
315 25S ribosomal DNA interspacer (ITS) was used (Mason et al., 2008). qPCR was performed in  
316 a BioRad CFX96 real-time system as described previously (Wang et al., 2017b). The primers  
317 used are described in Supplemental table 8.

318

### 319 **Reverse transcription quantitative PCR (RT-qPCR)**

320 RNA was extracted using the Plant RNA kit (OMEGA Bio-Tek); cDNA was prepared using the  
321 iScript™ gDNA Clear cDNA Synthesis Kit (Bio-Rad) according to the manufacturer's



322 instructions. The qPCR reaction was performed with Hieff® qPCR SYBR® Green Master Mix  
323 (Yeasen), with the following program: 3 min at 95°C, and 40 cycles consisting of 15 s at 95°C,  
324 30 s at 60°C. *Elongation factor-1 alpha (NbEF1α)* (Nicot et al., 2005) or *Actin2 (NbACT)*  
325 (*Viczián et al., 2014*) were used as reference genes, as indicated. The primers used are  
326 described in Supplemental table 8.

327

### 328 **Bacterial infections**

329 Four-week-old *N. benthamiana* leaves were infiltrated with a *P. syringae* pv. *tomato* DC3000  
330  $\Delta$ *hopQ1-1* suspension (Rufian et al., 2018) (OD<sub>600</sub> = 0.0002 in 10 mM MgCl<sub>2</sub>) using a 1 mL  
331 needleless syringe upon transient expression of the construct of interest. Bacterial growth was  
332 determined three days after inoculation by plating 1:10 serial dilutions of leaf extracts on solid  
333 LB medium (1% tryptone, 0.5% yeast extract, and 0.5% NaCl) with the appropriate antibiotics;  
334 plates were incubated at 28°C for two days before bacterial colony-forming units (cfu) were  
335 counted.

336

### 337 **RNA seq and analysis**

338 Transcriptome sequencing in *N. benthamiana* was performed as previously described (Wu et  
339 al., 2019). Four biological replicates were used per sample. The paired-end reads were  
340 cleaned by Trimmomatic (Bolger et al., 2014) (version 0.36). Clean read pairs were retained  
341 for further analysis after trimming the adapter sequence, removing low quality bases, and  
342 filtering short reads. The *N. benthamiana* draft genome sequence (v1.0.1) (Bombarely et al.,  
343 2012) was downloaded from the Sol Genomics Network  
344 ([ftp://ftp.solgenomics.net/genomes/Nicotiana\\_benthamiana/assemblies/](ftp://ftp.solgenomics.net/genomes/Nicotiana_benthamiana/assemblies/)). Clean reads were  
345 mapped to the genome sequence by HISAT (Kim et al., 2015) (version 2.1.0) with default  
346 parameters. The number of reads that were mapped to each *N. benthamiana* gene was  
347 calculated with the htseq-count script in HTSeq (Bombarely et al., 2012). Differentially  
348 expressed genes (DEGs) with at least 1.5 fold change in expression and a FDR < 0.05  
349 between control and experiment samples were identified by using EdgeR (Robinson et al.,  
350 2010).

351

352 The heatmap with hierarchical clustering was drawn by R package pheatmap. Venn diagrams  
353 were drawn by Venny (<http://bioinformatics.psb.ugent.be/webtools/Venn/>) and modified in  
354 Adobe Illustrator. The *Arabidopsis thaliana* homologous genes of the DEGs identified in *N.*  
355 *benthamiana* were used for Gene Ontology (GO) term enrichment analysis in AgriGO v2.0  
356 (Tian et al., 2017).

357

### 358 **ACKNOWLEDGEMENTS**

359 The authors thank past and present members of the Lozano-Duran lab for fruitful discussions;  
360 Xinyu Jian, Aurora Luque, the PSC Core Cell Biology Facility, and the PSC Core Genomics  
361 Facility for technical assistance; and Alberto P Macho for critical reading of this manuscript.  
362 This work was supported by the Strategic Priority Research Program of the Chinese Academy  
363 of Sciences (CAS) (grant number XDB27040206) and the Shanghai Center for Plant Stress  
364 Biology, CAS. RL-D is the recipient of a National Foreign Talents project (grant number

365 G20200113006). LM-P is the recipient of a Young Investigator Grant from the Natural Science  
366 Foundation of China (NSFC) (grant number 31850410467), a President's International  
367 Fellowship Initiative (PIFI) postdoctoral fellowship (2018PB058 and 2020PB0080) from CAS,  
368 and a Foreign Youth Talent Program project (grant number 20WZ2503900) from the Shanghai  
369 Science and Technology Commission. BGG is the recipient of a President's International  
370 Fellowship Initiative (PIFI) postdoctoral fellowship (2020PB0082), a Talent-Introduction grant  
371 from the Chinese Postdoctoral International Exchange, and a Foreign Youth Talent Program  
372 project (grant number 20WZ2504500) from the Shanghai Science and Technology  
373 Commission. EA is the recipient of a Young Investigator Grant from the NSFC (grant number  
374 31950410534), a Marie Skłodowska-Curie Grant from the European Union's Horizon 2020  
375 Research and Innovation Program (Grant 896910-GeminiDECODER), and a National Foreign  
376 Talents project (grant number QN20200113001).

377

## 378 REFERENCES

- 379 Ashford, P., Hernandez, A., Greco, T.M., Buch, A., Sodeik, B., Cristea, I.M., Grunewald, K., Shepherd,  
380 A., and Topf, M. (2016). HVint: A strategy for identifying novel protein-protein interactions in  
381 herpes simplex virus type 1. *Mol Cell Proteomics* 15, 2939-2953.
- 382 Bolger, A.M., Lohse, M., and Usadel, B. (2014). Trimmomatic: a flexible trimmer for Illumina sequence  
383 data. *Bioinformatics* 30, 2114-2120.
- 384 Bombarely, A., Rosli, H.G., Vrebalov, J., Moffett, P., Mueller, L.A., and Martin, G.B. (2012). A draft  
385 genome sequence of *Nicotiana benthamiana* to enhance molecular plant-microbe biology  
386 research. *Mol Plant Microbe Interact* 25, 1523-1530.
- 387 Bragg, J.N., and Jackson, A.O. (2004). The C-terminal region of the *Barley stripe mosaic virus* gamma-  
388 b protein participates in homologous interactions and is required for suppression of RNA silencing.  
389 *Mol Plant Pathol* 5, 465-481.
- 390 Brito, A.F., and Pinney, J.W. (2017). Protein-protein interactions in virus-host systems. *Front Microbiol*  
391 8, 1557.
- 392 Calderwood, M.A., Venkatesan, K., Xing, L., Chase, M.R., Vazquez, A., Holthaus, A.M., Ewence, A.E.,  
393 Li, N., Hirozane-Kishikawa, T., Hill, D.E., *et al.* (2007). Epstein-Barr virus and virus human protein  
394 interaction maps. *Proceedings of the National Academy of Sciences of the United States of*  
395 *America* 104, 7606-7611.
- 396 Caracuel, Z., Lozano-Duran, R., Huguet, S., Arroyo-Mateos, M., Rodriguez-Negrete, E.A., and  
397 Bejarano, E.R. (2012). C2 from *Beet curly top virus* promotes a cell environment suitable for  
398 efficient replication of geminiviruses, providing a novel mechanism of viral synergism. *New Phytol*  
399 194, 846-858.
- 400 Dao, T.N.M., Kang, S.H., Bak, A., and Folimonova, S.Y. (2020). A non-conserved p33 protein of Citrus  
401 tristeza virus interacts with multiple viral partners. *Mol Plant Microbe Interact* 33, 859-870.
- 402 DeBlasio, S.L., Xu, Y., Johnson, R.S., Rebelo, A.R., MacCoss, M.J., Gray, S.M., and Heck, M. (2018).  
403 The interaction dynamics of two *Potato leafroll virus* movement proteins affects their localization  
404 to the outer membranes of mitochondria and plastids. *Viruses* 10.

- 405 Dyer, M.D., Murali, T.M., and Sobral, B.W. (2011). Supervised learning and prediction of physical  
406 interactions between human and HIV proteins. *Infect Genet Evol* 11, 917-923.
- 407 Fossum, E., Friedel, C.C., Rajagopala, S.V., Titz, B., Baiker, A., Schmidt, T., Kraus, T., Stellberger, T.,  
408 Rutenberg, C., Suthram, S., *et al.* (2009). Evolutionarily conserved herpesviral protein interaction  
409 networks. *PLoS Pathog* 5, e1000570.
- 410 Guirimand, T., Delmotte, S., and Navratil, V. (2015). VirHostNet 2.0: surfing on the web of virus/host  
411 molecular interactions data. *Nucleic Acids Res* 43, D583-587.
- 412 Hagen, N., Bayer, K., Rosch, K., and Schindler, M. (2014). The intraviral protein interaction network of  
413 hepatitis C virus. *Mol Cell Proteomics* 13, 1676-1689.
- 414 Hallan, V., and Gafni, Y. (2001). *Tomato yellow leaf curl virus* (TYLCV) capsid protein (CP) subunit  
415 interactions: implications for viral assembly. *Arch Virol* 146, 1765-1773.
- 416 Karimi, M., Inzé, D., and Depicker, A. (2002). GATEWAY™ vectors for Agrobacterium-mediated plant  
417 transformation. *Trends in Plant Science* 7, 193-195.
- 418 Kim, D., Langmead, B., and Salzberg, S.L. (2015). HISAT: a fast spliced aligner with low memory  
419 requirements. *Nat Methods* 12, 357-360.
- 420 King, C.R., Zhang, A., Tessier, T.M., Gameiro, S.F., and Mymryk, J.S. (2018). Hacking the cell: network  
421 intrusion and exploitation by adenovirus E1A. *mBio* 9.
- 422 Leastro, M.O., Kitajima, E.W., Silva, M.S., Resende, R.O., and Freitas-Astua, J. (2018). Dissecting the  
423 subcellular localization, intracellular trafficking, interactions, membrane association, and topology  
424 of citrus leprosis virus C proteins. *Front Plant Sci* 9, 1299.
- 425 Lee, S., Salwinski, L., Zhang, C., Chu, D., Sampankanpanich, C., Reyes, N.A., Vangeloff, A., Xing, F.,  
426 Li, X., Wu, T.T., *et al.* (2011). An integrated approach to elucidate the intra-viral and viral-cellular  
427 protein interaction networks of a gamma-herpesvirus. *PLoS Pathog* 7, e1002297.
- 428 Li, H., Li, F., Zhang, M., Gong, P., and Zhou, X. (2020). Dynamic subcellular localization, accumulation,  
429 and interactions of proteins from *Tomato yellow leaf curl China virus* and its associated  
430 betasatellite. *Front Plant Sci* 11, 840.
- 431 Li, J., Guo, M., Tian, X., Wang, X., Yang, X., Wu, P., Liu, C., Xiao, Z., Qu, Y., Yin, Y., *et al.* (2021).  
432 Virus-host interactome and proteomic survey reveal potential virulence factors influencing SARS-  
433 CoV-2 pathogenesis. *Med (N Y)* 2, 99-112 e117.
- 434 Liu, L., Chung, H.Y., Lacatus, G., Baliji, S., Ruan, J., and Sunter, G. (2014). Altered expression of  
435 Arabidopsis genes in response to a multifunctional geminivirus pathogenicity protein. *BMC Plant*  
436 *Biol* 14, 302.
- 437 Liu, Y., Wang, C., Mueller, S., Paul, A.V., Wimmer, E., and Jiang, P. (2010). Direct interaction between  
438 two viral proteins, the nonstructural protein 2C and the capsid protein VP3, is required for  
439 *Enterovirus* morphogenesis. *PLoS Pathog* 6, e1001066.
- 440 Loureiro, M.E., D'Antuono, A., Levingston Macleod, J.M., and Lopez, N. (2012). Uncovering viral  
441 protein-protein interactions and their role in arenavirus life cycle. *Viruses* 4, 1651-1667.
- 442 Lu, Q., Tang, X., Tian, G., Wang, F., Liu, K., Nguyen, V., Kohalmi, S.E., Keller, W.A., Tsang, E.W.,  
443 Harada, J.J., *et al.* (2010). Arabidopsis homolog of the yeast TREX-2 mRNA export complex:  
444 components and anchoring nucleoporin. *Plant J* 61, 259-270.

- 445 Macho, A.P., Schwessinger, B., Ntoukakis, V., Brutus, A., Segonzac, C., Roy, S., Kadota, Y., Oh, M.-  
446 H., Sklenar, J., Derbyshire, P., *et al.* (2014). A bacterial tyrosine phosphatase inhibits plant  
447 pattern recognition receptor activation. *Science* **343**, 1509.
- 448 Mason, G., Caciagli, P., Accotto, G.P., and Noris, E. (2008). Real-time PCR for the quantitation of  
449 *Tomato yellow leaf curl Sardinia virus* in tomato plants and in *Bemisia tabaci*. *J Virol Methods*  
450 **147**, 282-289.
- 451 Medina-Puche, L., Tan, H., Dogra, V., Wu, M., Rosas-Diaz, T., Wang, L., Ding, X., Zhang, D., Fu, X.,  
452 Kim, C., *et al.* (2020). A defense pathway linking plasma membrane and chloroplasts and co-  
453 opted by pathogens. *Cell* **182**, 1109-1124 e1125.
- 454 Minas, K., McEwan, N.R., Newbold, C.J., and Scott, K.P. (2011). Optimization of a high-throughput  
455 CTAB-based protocol for the extraction of qPCR-grade DNA from rumen fluid, plant and bacterial  
456 pure cultures. *FEMS Microbiol Lett* **325**, 162-169.
- 457 Nakagawa, T., Kurose, T., Hino, T., Tanaka, K., Kawamukai, M., Niwa, Y., Toyooka, K., Matsuoka, K.,  
458 Jinbo, T., and Kimura, T. (2007a). Development of series of gateway binary vectors, pGWBs, for  
459 realizing efficient construction of fusion genes for plant transformation. *Journal of Bioscience and*  
460 *Bioengineering* **104**, 34-41.
- 461 Nakagawa, T., Suzuki, T., Murata, S., Nakamura, S., Hino, T., Maeo, K., Tabata, R., Kawai, T., Tanaka,  
462 K., Niwa, Y., *et al.* (2007b). Improved Gateway binary vectors: high-performance vectors for  
463 creation of fusion constructs in transgenic analysis of plants. *Biosci Biotechnol Biochem* **71**, 2095-  
464 2100.
- 465 Nicot, N., Hausman, J.F., Hoffmann, L., and Evers, D. (2005). Housekeeping gene selection for real-  
466 time RT-PCR normalization in potato during biotic and abiotic stress. *J Exp Bot* **56**, 2907-2914.
- 467 Nobre, L.V., Nightingale, K., Ravenhill, B.J., Antrobus, R., Soday, L., Nichols, J., Davies, J.A., Seirafian,  
468 S., Wang, E.C., Davison, A.J., *et al.* (2019). Human cytomegalovirus interactome analysis  
469 identifies degradation hubs, domain associations and viral protein functions. *Elife* **8**.
- 470 Robinson, M.D., McCarthy, D.J., and Smyth, G.K. (2010). edgeR: a Bioconductor package for  
471 differential expression analysis of digital gene expression data. *Bioinformatics* **26**, 139-140.
- 472 Rosas-Diaz, T., Macho, A.P., Beuzon, C.R., Lozano-Duran, R., and Bejarano, E.R. (2016). The C2  
473 protein from the geminivirus *Tomato yellow leaf curl Sardinia virus* decreases sensitivity to  
474 jasmonates and suppresses jasmonate-mediated defences. *Plants (Basel)* **5**.
- 475 Rosas-Diaz, T., Zhang, D., Fan, P., Wang, L., Ding, X., Jiang, Y., Jimenez-Gongora, T., Medina-Puche,  
476 L., Zhao, X., Feng, Z., *et al.* (2018). A virus-targeted plant receptor-like kinase promotes cell-to-  
477 cell spread of RNAi. *Proceedings of the National Academy of Sciences* **115**, 1388.
- 478 Rozen, R., Sathish, N., Li, Y., and Yuan, Y. (2008). Virion-wide protein interactions of Kaposi's sarcoma-  
479 associated herpesvirus. *J Virol* **82**, 4742-4750.
- 480 Rufian, J.S., Lucia, A., Rueda-Blanco, J., Zumaquero, A., Guevara, C.M., Ortiz-Martin, I., Ruiz-Aldea,  
481 G., Macho, A.P., Beuzon, C.R., and Ruiz-Albert, J. (2018). Suppression of HopZ effector-  
482 triggered plant immunity in a natural pathosystem. *Front Plant Sci* **9**, 977.
- 483 Settlege, S.B., See, R.G., and Hanley-Bowdoin, L. (2005). Geminivirus C3 protein: replication  
484 enhancement and protein interactions. *J Virol* **79**, 9885-9895.

- 485 Soitamo, A.J., Jada, B., and Lehto, K. (2012). Expression of geminiviral AC2 RNA silencing suppressor  
486 changes sugar and jasmonate responsive gene expression in transgenic tobacco plants. *BMC*  
487 *Plant Biol* 12, 204.
- 488 Stellberger, T., Hauser, R., Baiker, A., Pothineni, V.R., Haas, J., and Uetz, P. (2010). Improving the  
489 yeast two-hybrid system with permuted fusions proteins: the Varicella Zoster Virus interactome.  
490 *Proteome Sci* 8, 8.
- 491 Tian, T., Liu, Y., Yan, H., You, Q., Yi, X., Du, Z., Xu, W., and Su, Z. (2017). agriGO v2.0: a GO analysis  
492 toolkit for the agricultural community, 2017 update. *Nucleic Acids Res* 45, W122-W129.
- 493 Trinks, D., Rajeswaran, R., Shivaprasad, P.V., Akbergenov, R., Oakeley, E.J., Veluthambi, K., Hohn,  
494 T., and Pooggin, M.M. (2005). Suppression of RNA silencing by a geminivirus nuclear protein,  
495 AC2, correlates with transactivation of host genes. *J Virol* 79, 2517-2527.
- 496 Uetz, P., Dong, Y.A., Zeretzke, C., Atzler, C., Baiker, A., Berger, B., Rajagopala, S.V., Roupelieva, M.,  
497 Rose, D., Fossum, E., *et al.* (2006). Herpesviral protein networks and their interaction with the  
498 human proteome. *Science* 311, 239-242.
- 499 Varasteh Moradi, S., Gagoski, D., Mureev, S., Walden, P., McMahon, K.A., Parton, R.G., Johnston,  
500 W.A., and Alexandrov, K. (2020). Mapping interactions among cell-free expressed Zika virus  
501 proteins. *J Proteome Res* 19, 1522-1532.
- 502 Viczián, O., Künstler, A., Hafez, Y., and Király, L. (2014). Catalases may play different roles in  
503 influencing resistance to virus-induced hypersensitive necrosis. *Acta Phytopathologica et*  
504 *Entomologica Hungarica* 49, 189-200.
- 505 von Brunn, A., Teepe, C., Simpson, J.C., Pepperkok, R., Friedel, C.C., Zimmer, R., Roberts, R., Baric,  
506 R., and Haas, J. (2007). Analysis of intraviral protein-protein interactions of the SARS coronavirus  
507 ORFeome. *PLoS One* 2, e459.
- 508 Wang, L., Ding, X., Xiao, J., Jimenez-Góngora, T., Liu, R., and Lozano-Duran, R. (2017a). Inference of  
509 a geminivirus-host protein-protein interaction network through affinity purification and mass  
510 spectrometry analysis. *Viruses* 9, 273.
- 511 Wang, L., Ding, Y., He, L., Zhang, G., Zhu, J.-K., and Lozano-Duran, R. (2020). A virus-encoded protein  
512 suppresses methylation of the viral genome in the Cajal body through its interaction with AGO4.  
513 *eLife* 9:e55542.
- 514 Wang, L., Tan, H., Wu, M., Jimenez-Gongora, T., Tan, L., and Lozano-Duran, R. (2017b). Dynamic  
515 virus-dependent subnuclear localization of the capsid protein from a geminivirus. *Front Plant Sci*  
516 8, 2165.
- 517 Wang, Y., Li, Y., Rosas-Diaz, T., Caceres-Moreno, C., Lozano-Duran, R., and Macho, A.P. (2019). The  
518 IMMUNE-ASSOCIATED NUCLEOTIDE-BINDING 9 protein is a regulator of basal immunity in  
519 *Arabidopsis thaliana*. *Mol Plant Microbe Interact* 32, 65-75.
- 520 Wu, M., Ding, X., Fu, X., and Lozano-Duran, R. (2019). Transcriptional reprogramming caused by the  
521 geminivirus *Tomato yellow leaf curl virus* in local or systemic infections in *Nicotiana benthamiana*.  
522 *BMC Genomics* 20, 542.
- 523 Yang, L.P., Fang, Y.Y., An, C.P., Dong, L., Zhang, Z.H., Chen, H., Xie, Q., and Guo, H.S. (2013). C2-  
524 mediated decrease in DNA methylation, accumulation of siRNAs, and increase in expression for  
525 genes involved in defense pathways in plants infected with *Beet severe curly top virus*. *Plant J*  
526 73, 910-917.

- 527 Zhao, W., Ji, Y., Wu, S., Ma, X., Li, S., Sun, F., Cheng, Z., Zhou, Y., and Fan, Y. (2018). Single amino  
528 acid in V2 encoded by TYLCV is responsible for its self-interaction, aggregates and pathogenicity.  
529 *Sci Rep* 8, 3561.
- 530 Zhao, W., Wu, S., Barton, E., Fan, Y., Ji, Y., Wang, X., and Zhou, Y. (2020). *Tomato yellow leaf curl*  
531 *virus* V2 protein plays a critical role in the nuclear export of V1 protein and viral systemic infection.  
532 *Front Microbiol* 11, 1243.
- 533 Zheng, L.L., Li, C., Ping, J., Zhou, Y., Li, Y., and Hao, P. (2014). The domain landscape of virus-host  
534 interactomes. *Biomed Res Int* 2014, 867235.
- 535
- 536
- 537

538 **FIGURES**

539

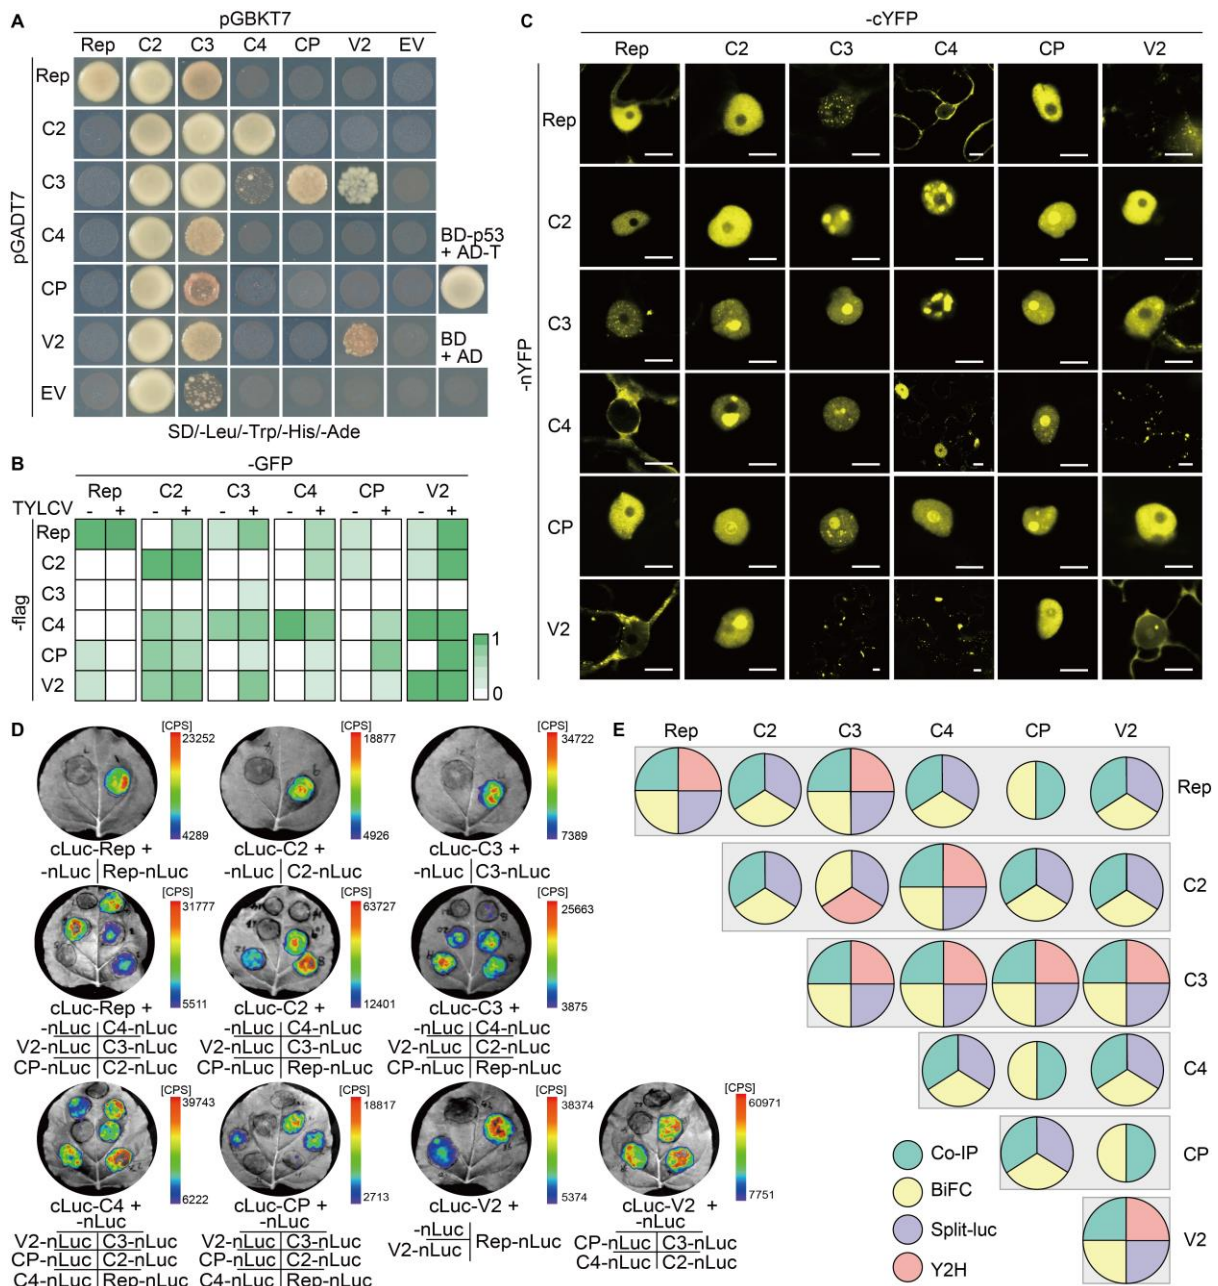

540

541

542 **Figure 1. The proteins encoded by the plant DNA virus *Tomato yellow leaf curl virus***  
 543 **associate with one another in the plant cell.**

544 (A) Viral protein-protein interactions detected in yeast two-hybrid. The minimal synthetic  
 545 defined (SD) medium without leucine (Leu), tryptophan (Trp), histidine (His), and adenine (Ade)  
 546 was used to select positive interactions; SD without Leu and Trp was used to select co-  
 547 transformants (Supplementary figure 2). The interaction between the SV40 large T antigen (T)  
 548 and the tumor suppressor p53 is a positive control. AD: activation domain; BD: binding domain.  
 549 This experiment was repeated three times with similar results. (B) Summary of viral protein-

550 protein interactions detected by co-immunoprecipitation (co-IP) in the absence or presence of  
551 *Tomato yellow leaf curl virus* (TYLCV). These experiments were repeated at least three times;  
552 the colour scale represents the percentage of positive interaction results among all replicates,  
553 with 1=100%. The original co-IP blots are shown in Supplementary figure 2 (in the absence of  
554 TYLCV) and Supplementary figure 3 (in the presence of TYLCV). **(C)** Viral protein-protein  
555 interactions detected by bimolecular fluorescence complementation (BiFC) in *N. benthamiana*  
556 leaves. nYFP: N-terminal half of the YFP; cYFP: C-terminal half of the YFP. Images were  
557 taken at 2 days post-infiltration (dpi). Scale bar = 10  $\mu$ m. This experiment was repeated at  
558 least four times with similar results; combination with Hoechst staining and negative controls  
559 can be found in Supplementary figure 5. Additional images are shown in Supplementary figure  
560 6. **(D)** Viral protein-protein interactions detected by split-luciferase assay in *N. benthamiana*  
561 leaves. nLuc: N-terminal part of the luciferase protein; cLuc: C-terminal part of the luciferase  
562 protein. Images were taken at 2 dpi. The colour scale represents the intensity of the interaction  
563 in counts per second (CPS). This experiment was repeated three times with similar results.  
564 **(E)** Summary of the intra-viral protein-protein interactions identified in A-D. Different colours  
565 represent different methods, as indicated; circle size indicates the number of the methods in  
566 which a positive interaction was detected.  
567



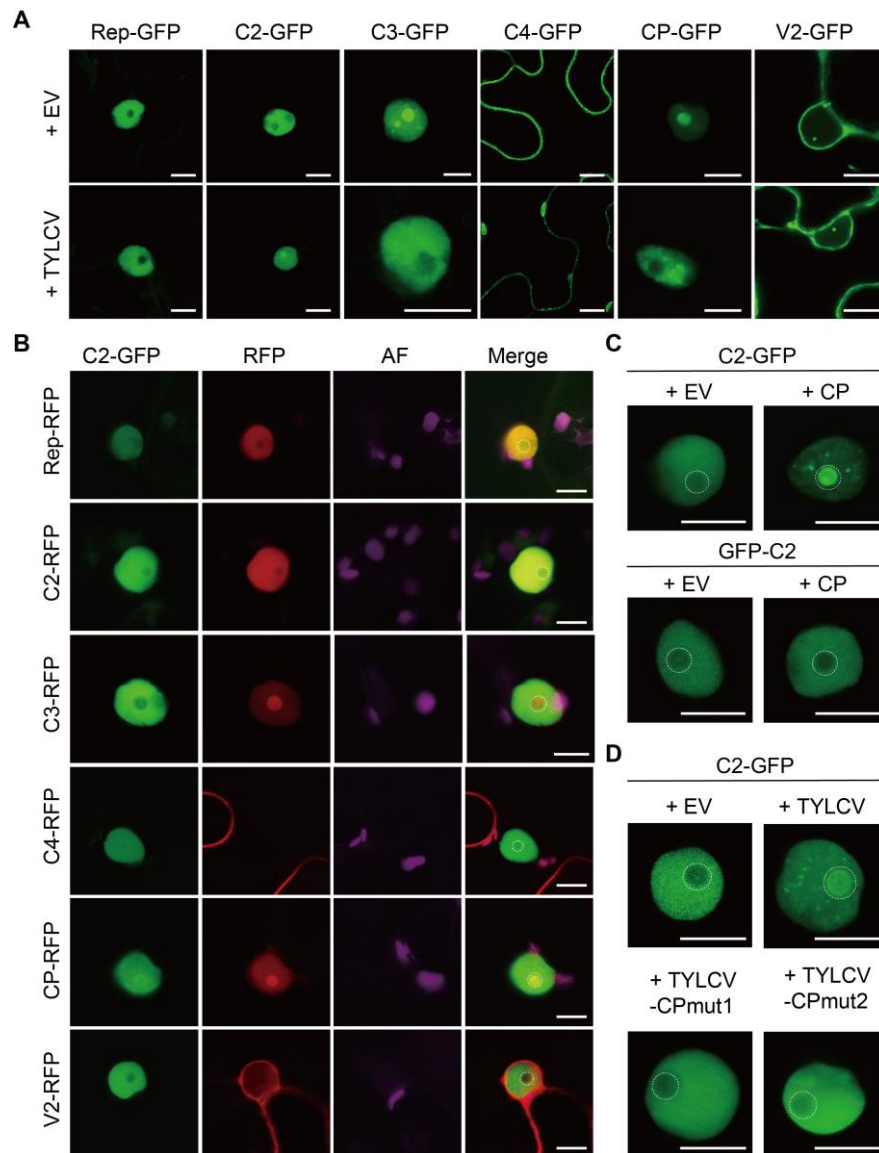

568

569

570 **Figure 2. CP is required and sufficient to change the subnuclear localization of C2.**

571 (A) Subcellular localization of the TYLCV-encoded proteins fused to GFP expressed alone  
 572 (+EV; co-transformed with an empty vector control) or in the context of the viral infection  
 573 (+TYLCV; co-transformed with a TYLCV infectious clone) in *N. benthamiana* leaves at 2 days  
 574 post infiltration (dpi). Scale bar = 10  $\mu$ m. EV: empty vector. (B) Subcellular localization of C2-  
 575 GFP expressed alone or co-expressed with each of the viral proteins fused to RFP in *N.*  
 576 *benthamiana* leaves at 2 dpi. Scale bar = 10  $\mu$ m. AF: Autofluorescence. (C). Subcellular  
 577 localization of C2-GFP or GFP-C2 when expressed alone (+EV) or co-expressed with CP  
 578 (+CP) in *N. benthamiana* leaves at 2 dpi. The accumulation of the CP transcript is shown in  
 579 Supplementary figure 7A. Scale bar = 10  $\mu$ m. EV: empty vector. (D). Subcellular localization  
 580 of C2-GFP when expressed alone (+EV) or in the context of the infection by the WT TYLCV  
 581 virus (+TYLCV) or mutated versions unable to produce CP (+TYLCV-CPmut1; +TYLCV-  
 582 CPmut2) in *N. benthamiana* leaves at 2 dpi. Viral accumulation is shown in Supplementary

583 figure 7B. For details on TYLCV-CPmut1 and TYLCV-CPmut2, see Materials and Methods.  
584 Scale bar = 10  $\mu$ m. EV: empty vector.  
585

586

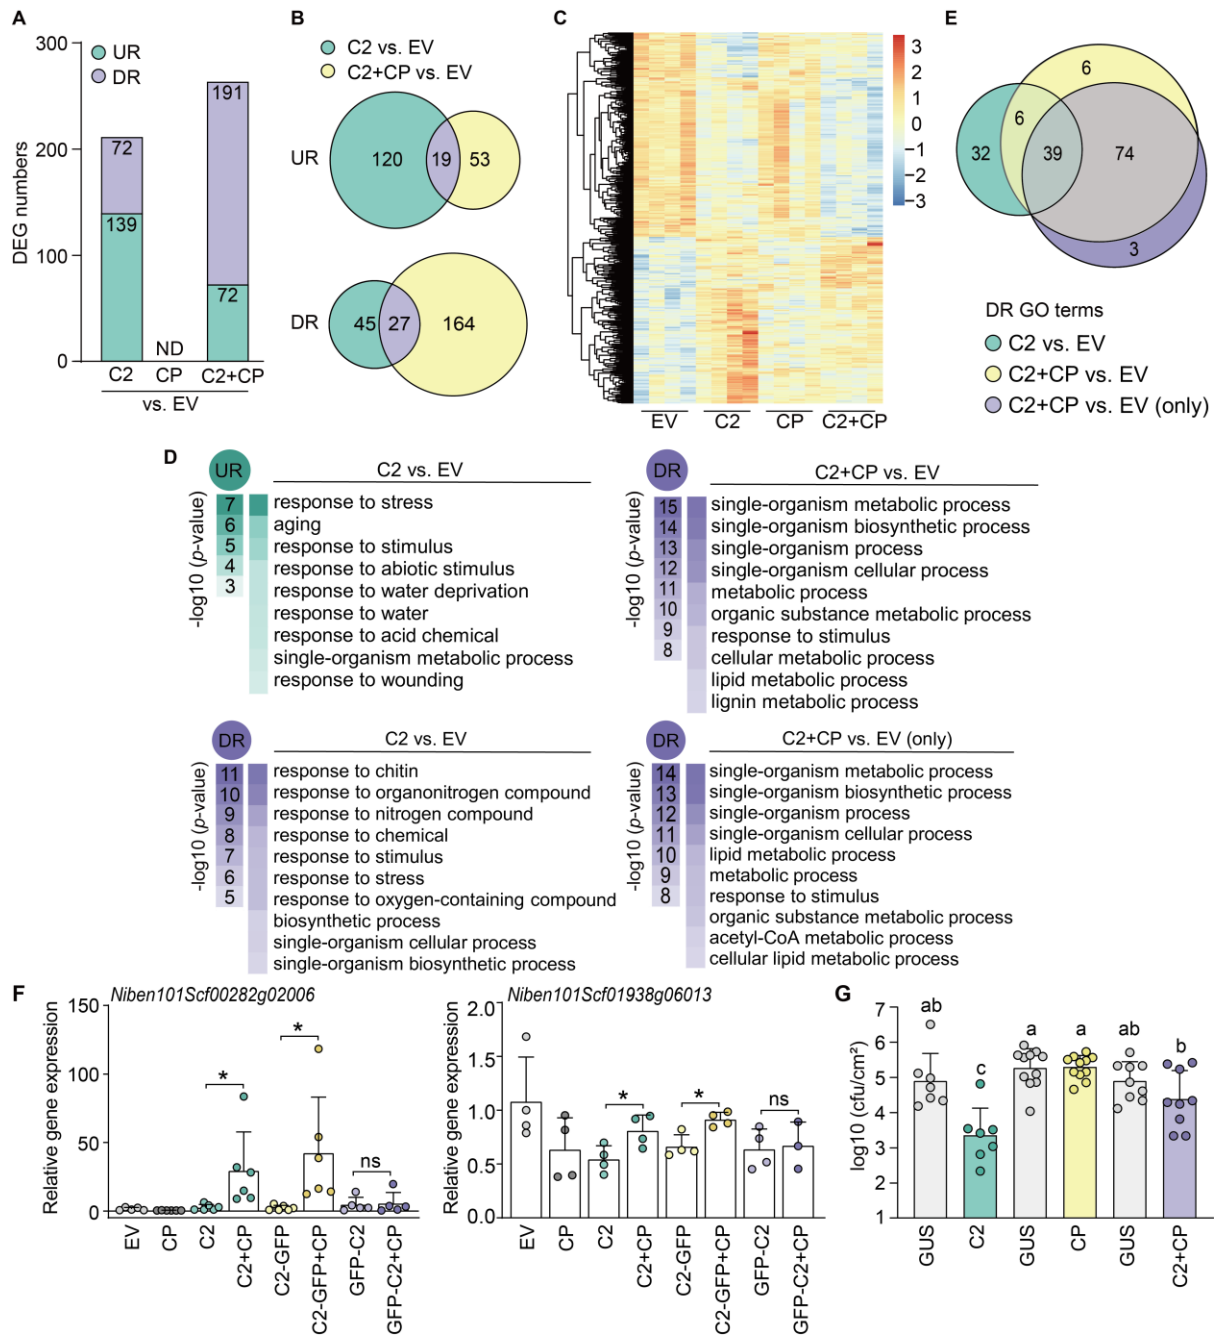

587

588

589

590 **Figure 3. C2 and CP functionally interact *in planta* and modify the transcriptome of *N.***  
 591 ***benthamiana* in an interdependent manner.**

592 (A) Number of differentially expressed genes (DEGs) upon expression of C2, CP, or C2+CP  
 593 in *N. benthamiana* leaves. UR: up-regulated; DR: down-regulated; ND: not detected; EV:  
 594 empty vector. Full lists can be found in Supplementary table 2. (B) Venn diagram of DEGs  
 595 upon expression of C2 or C2+CP in *N. benthamiana*. UR: up-regulated; DR: down-regulated;  
 596 EV: empty vector. (C) Heatmap with hierarchical clustering from samples in (A). The colour

597 scale indicates the Z-score. EV: empty vector. **(D)** Functional enrichment analysis of up-  
598 regulated (UR) or down-regulated (DR) genes in the indicated samples. Gene Ontology (GO)  
599 categories from the Biological Process ontology enriched with a  $p$ -value<0.01 (up to top 10)  
600 are shown; functional enrichment was performed using the orthologues in *Arabidopsis thaliana*.  
601 “C2+CP vs. EV (only)” denotes the subset of genes that are down-regulated in this sample  
602 only, and not in the samples expressing the viral proteins separately. The colour scale  
603 indicates the  $-\log_{10}$  ( $p$ -value), showing the significance of GO term enrichment. EV: empty  
604 vector. For a full list, see Supplementary table 3. **(E)** Venn diagram of the GO terms (Biological  
605 Process ontology) over-represented in the subsets of down-regulated genes ( $p$ -value<0.01)  
606 in the different samples. DR: down-regulated; EV: empty vector. For a full list, see  
607 Supplementary table 3. **(F)** Expression of selected DEGs upon transient expression of C2, C2-  
608 GFP, or GFP-C2 in the presence and absence of CP in *N. benthamiana* leaves measured by  
609 qRT-PCR. The samples expressing CP or empty vector (EV) are used as control. Expression  
610 values are the mean of at least three biological replicates. Error bars represent SD. Asterisks  
611 indicate a statistically significant difference (\*:  $p$ <0.05, \*\*:  $p$ <0.01) according to a two-tailed  
612 comparison t-test. *NbACT* was used as the normalizer. **(G)** *Pseudomonas syringae* pv *tomato*  
613 DC3000  $\Delta$ *hopQ1-1* growth in *N. benthamiana* leaves expressing C2, CP, C2+CP, or  $\beta$ -  
614 glucuronidase (GUS) as negative control. Values are the mean of more than six biological  
615 replicates. Error bars represent SD. Letters indicate a statistically significant difference  
616 ( $p$ <0.05) according to one-way ANOVA followed by post-hoc Tukey test. Experiments were  
617 repeated three times with similar results.  
618

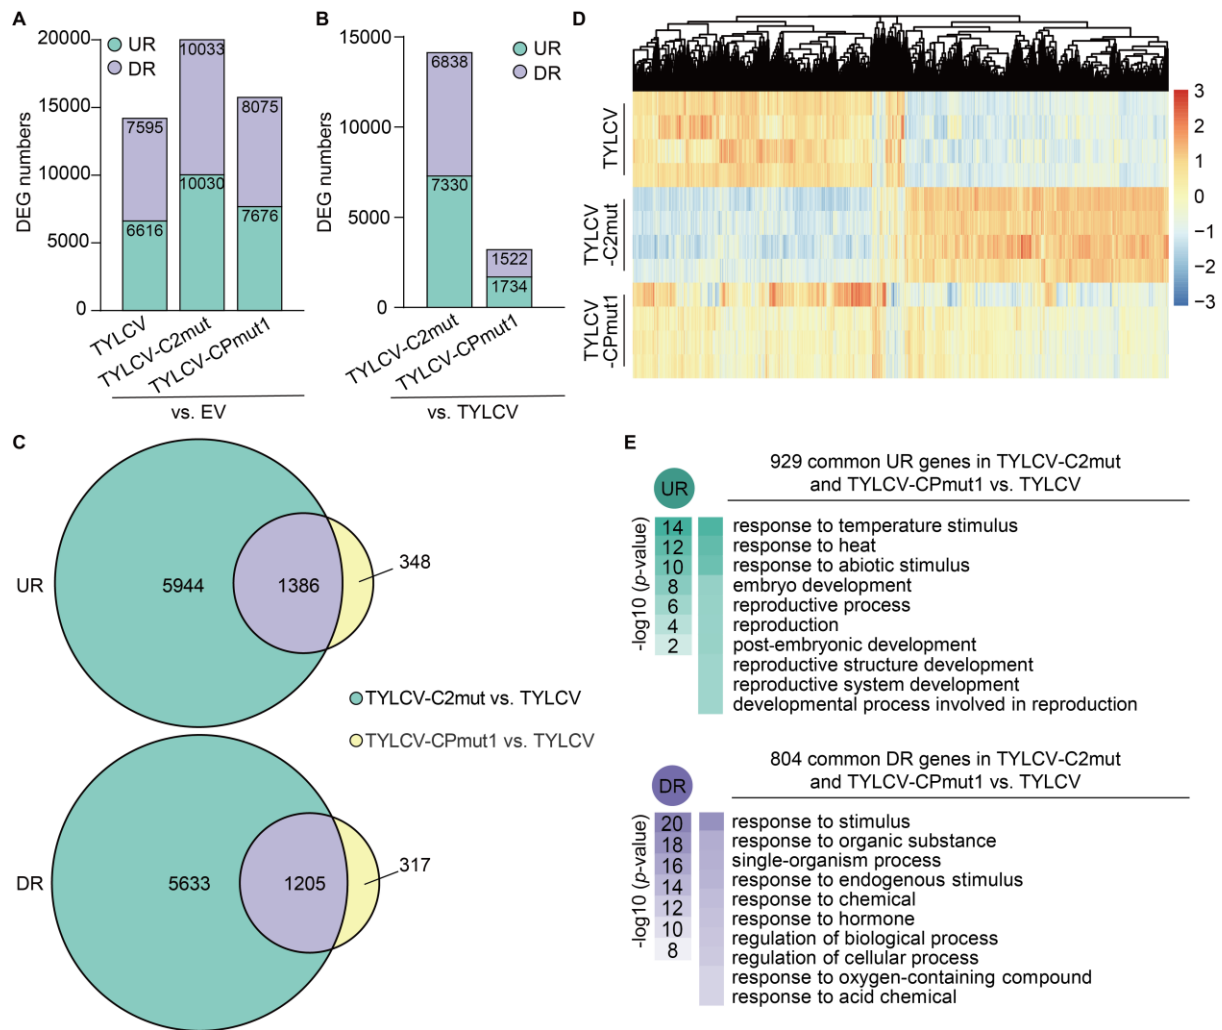

619

620

621

622 **Figure 4. C2 and CP functionally interact *in planta* in the context of the viral infection.**

623 (A and B) Number of differentially expressed genes (DEGs) upon infection by TYLCV WT or  
624 C2-null or CP-null mutant variants (TYLCV-C2mut and TYLCV-CPmut1, respectively) in *N.*

625 *benthamiana* leaves compared to the empty vector control (A), or to TYLCV WT (B). UR: up-  
626 regulated; DR: down-regulated; EV: empty vector. Full lists can be found in Supplementary

627 table 2. (C) Venn diagrams of DEGs upon infection by TYLCV C2-null and TYLCV CP-null  
628 mutants (TYLCV-C2mut and TYLCV-CPmut1, respectively) compared to TYLCV WT. UR: up-

629 regulated; DR: down-regulated. (D) Heatmap with hierarchical clustering from (A). The colour  
630 scale indicates the Z-score. (E) Functional enrichment analysis of the subsets of up-regulated

631 (UR) or down-regulated (DR) genes in the indicated samples. Gene Ontology (GO) categories  
632 from the Biological Process ontology enriched with a *p*-value<0.01 (up to top 10) are shown;

633 functional enrichment was performed using the orthologues in *Arabidopsis thaliana*. The  
634 colour scale indicates the -log<sub>10</sub> (*p*-value), showing the significance of GO term enrichment.

635 For a full list, see Supplementary table 4.
